# Supplementary material for: A Phylogenetic Perspective on Biogeographical Divergence of the Flora in Yunnan, Southwestern China
Source: PubMed Central journal article supplement (PMC5318862; doi:10.1038/srep43032), 2017-02-21
Supplement: srep43032-s1.pdf [file srep43032-s1.pdf]

# **A Phylogenetic Perspective on Biogeographical Divergence of the Flora in Yunnan, Southwestern China**

Shuiyin Liu<sup>1,3</sup>, Hua Zhu<sup>1\*</sup>, Jie Yang<sup>2\*</sup>

<sup>1</sup>Center for Integrative Conservation, Xishuangbanna Tropical Botanical Garden, Chinese Academy of Sciences, Kunming, China, <sup>2</sup>Key Laboratory of Tropical Forest Ecology, Xishuangbanna Tropical Botanical Garden, Chinese Academy of Sciences, Kunming, China, <sup>3</sup>University of Chinese Academy of Sciences, Beijing, China

\* Correspondence and requests for materials should be addressed to H.Z.

(zhuh@xtbg.ac.cn) and J.Y. (yangjie@xtbg.org.cn)

## Figures

**Figure S1. The net relatedness index (*NRI*) of the three floras at the family level.** The map was generated using ArcGIS 10.2.2. (<http://www.esri.com>)

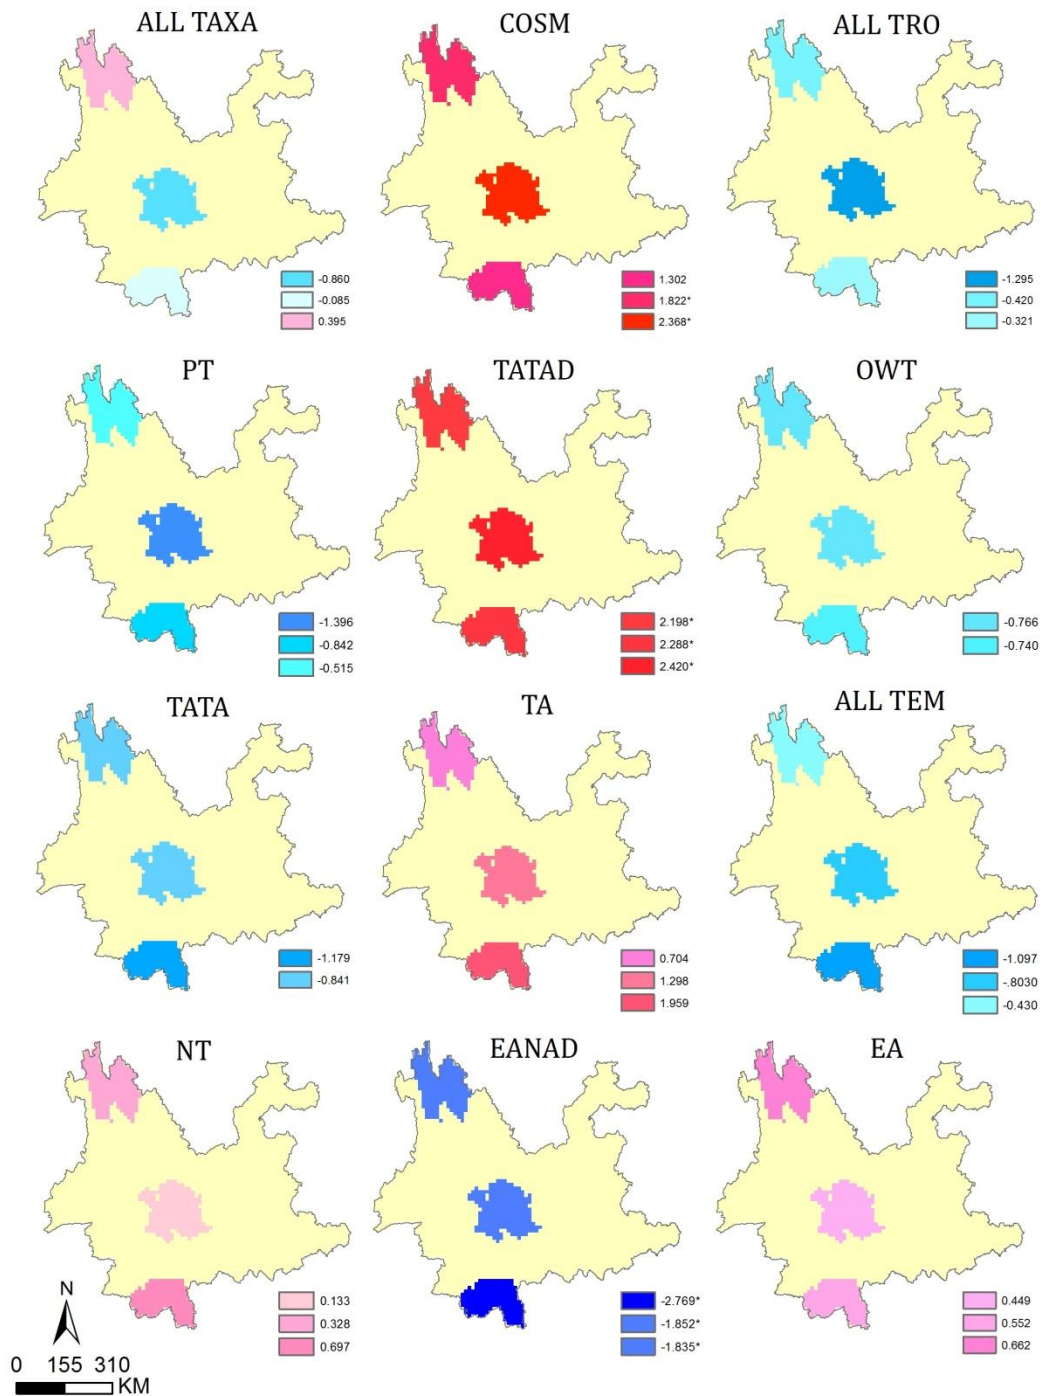

\*The  $p$ -values corresponding to *NRI* less than 0.05.

ALL TAXA, all taxa at the family level; COSM, cosmopolitan; ALL TRO, all taxa with tropical distributions; PT, pantropic; TATAD, tropical Asia and tropical America disjointed; OWT, old world tropic; TATA, tropical Asia to tropical Australia; TA, tropical Asia; ALL TEM, all taxa with temperate distributions; NT, north temperate; EANAD, east Asia and north America disjointed; and EA, east Asia.

**Figure S2. The nearest taxon index (*NTI*) of the three floras at the family level.**

The map was generated using ArcGIS 10.2.2. (<http://www.esri.com>)

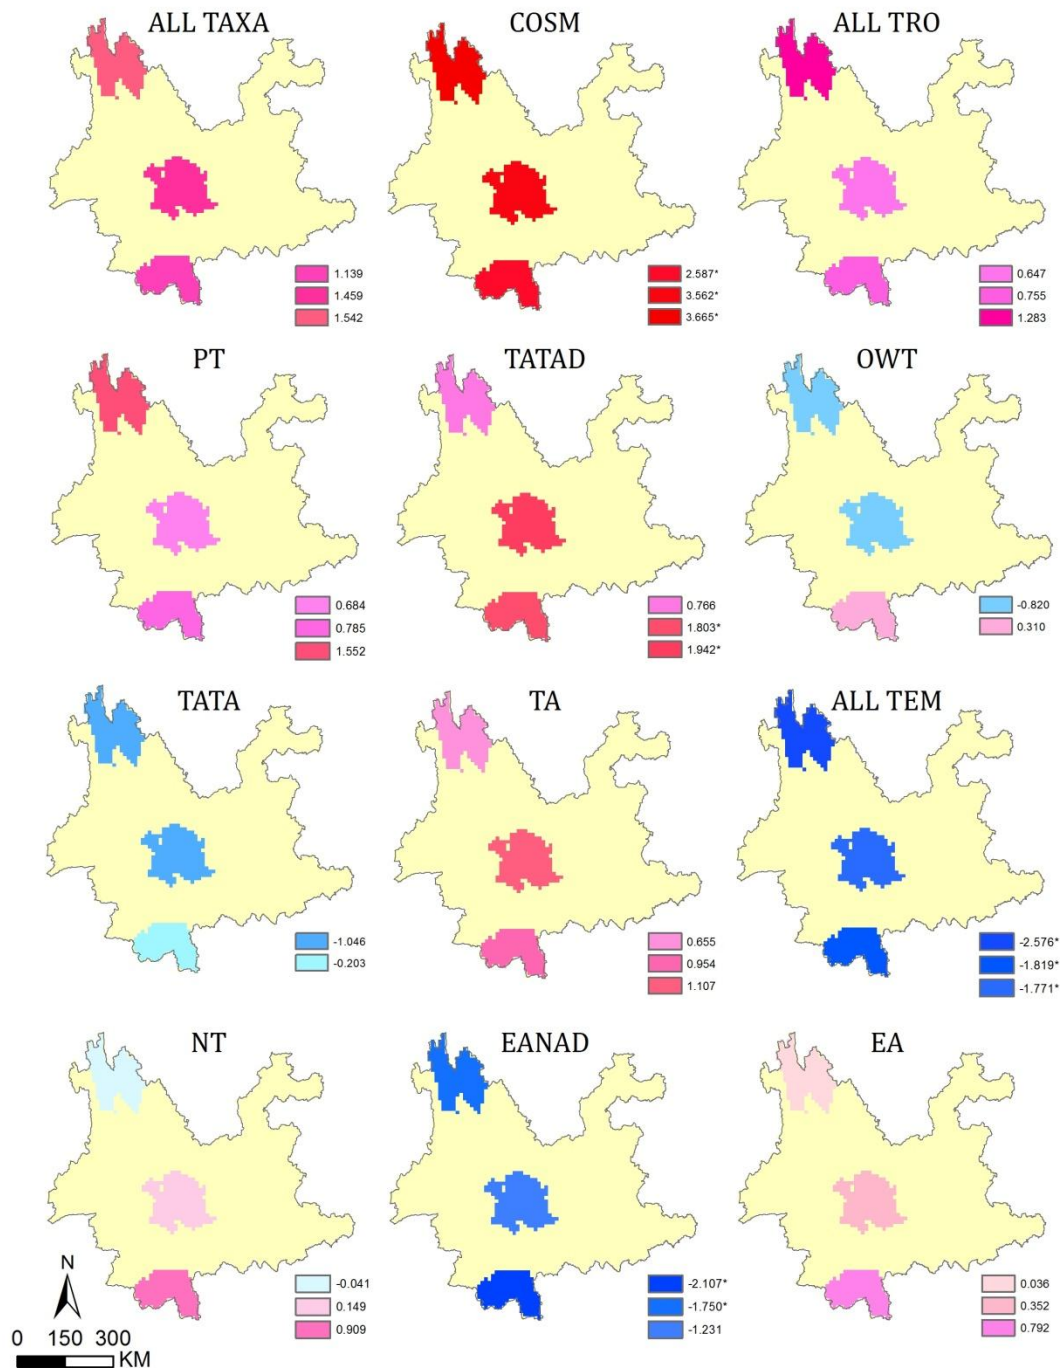

\*The *p*-values corresponding to *NTI* less than 0.05.

Figure S3. The Phylogenetic tree constructed from S.PhyloMaker of 212 families in three representative regions across Yunnan.

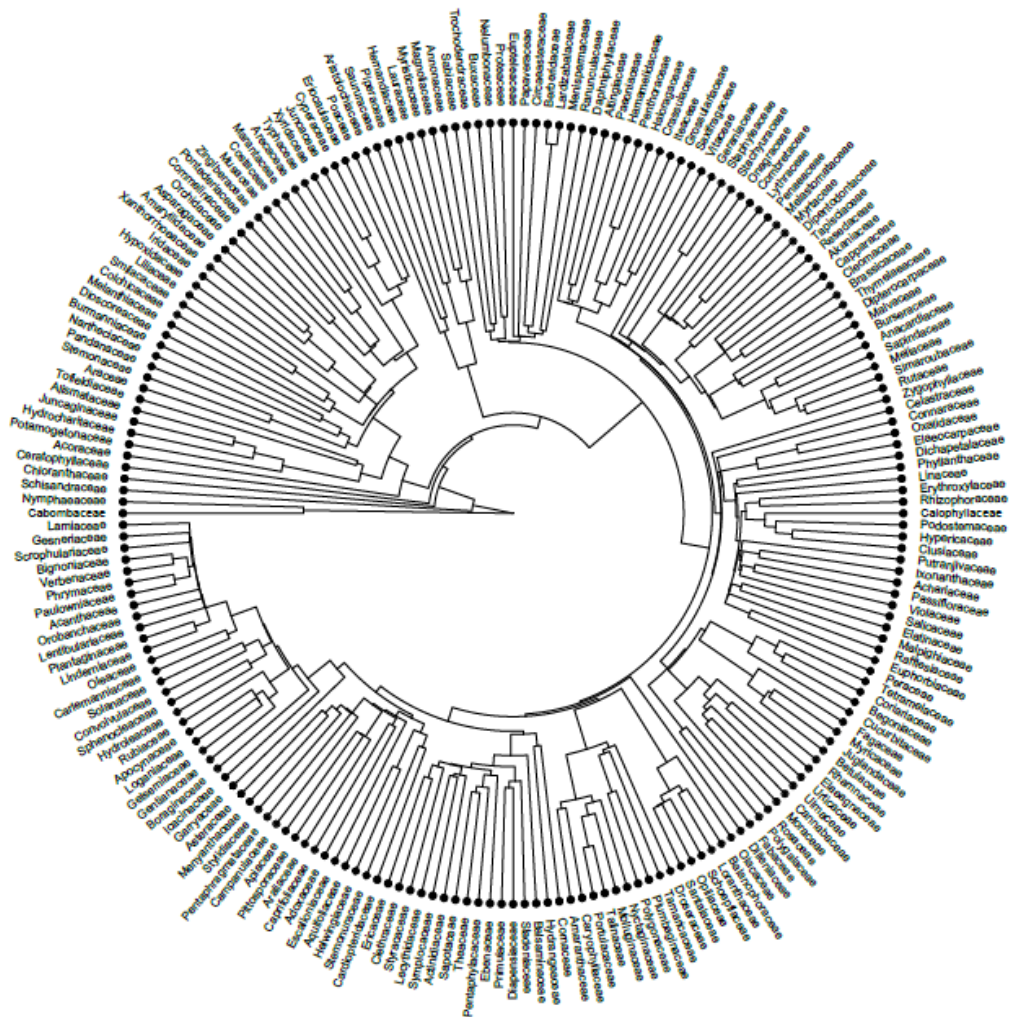

**Figure S4. The Phylogenetic tree of 1,860 genera in three representative regions across Yunnan, constructed from S.PhyloMaker with adding missing genera as polytomies within their families.**

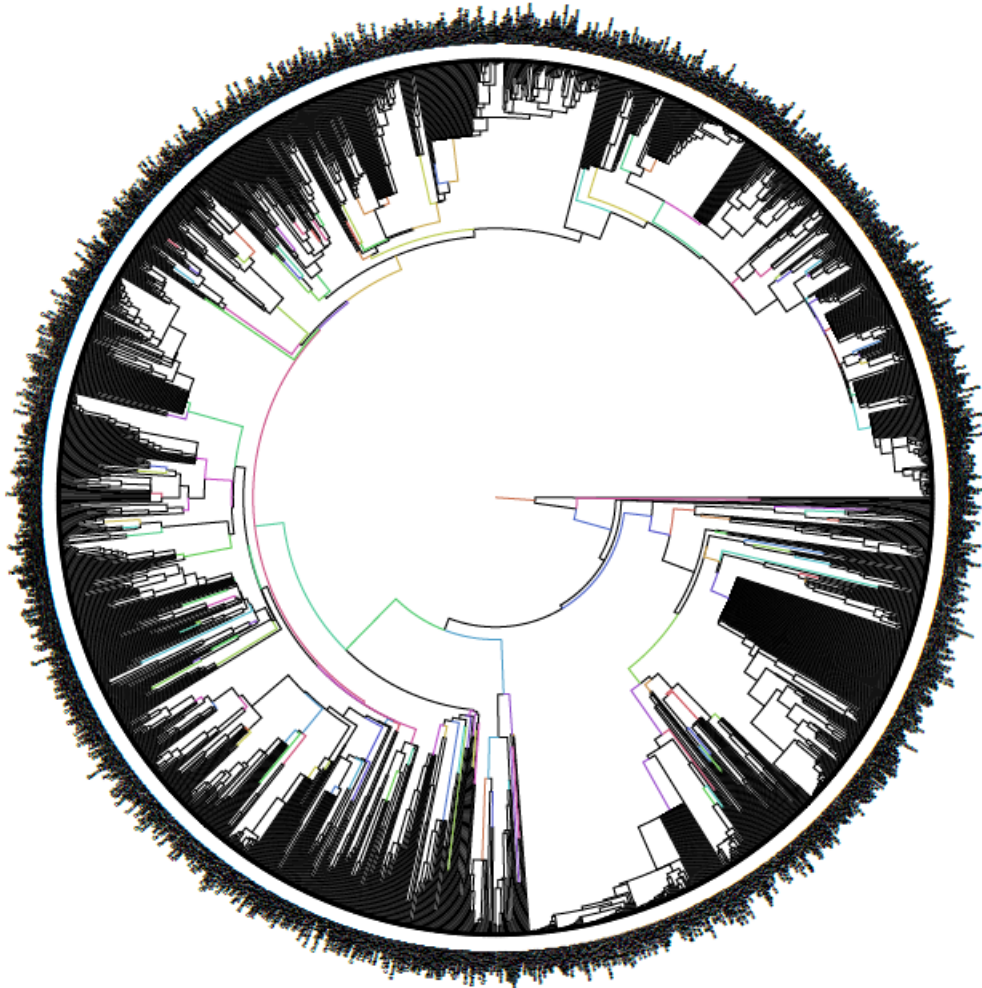



**Figure S5. The Phylogenetic tree of 9,370 species in three representative regions across Yunnan, constructed from S.PhyloMaker with adding missing species as polytomies within their genera.**

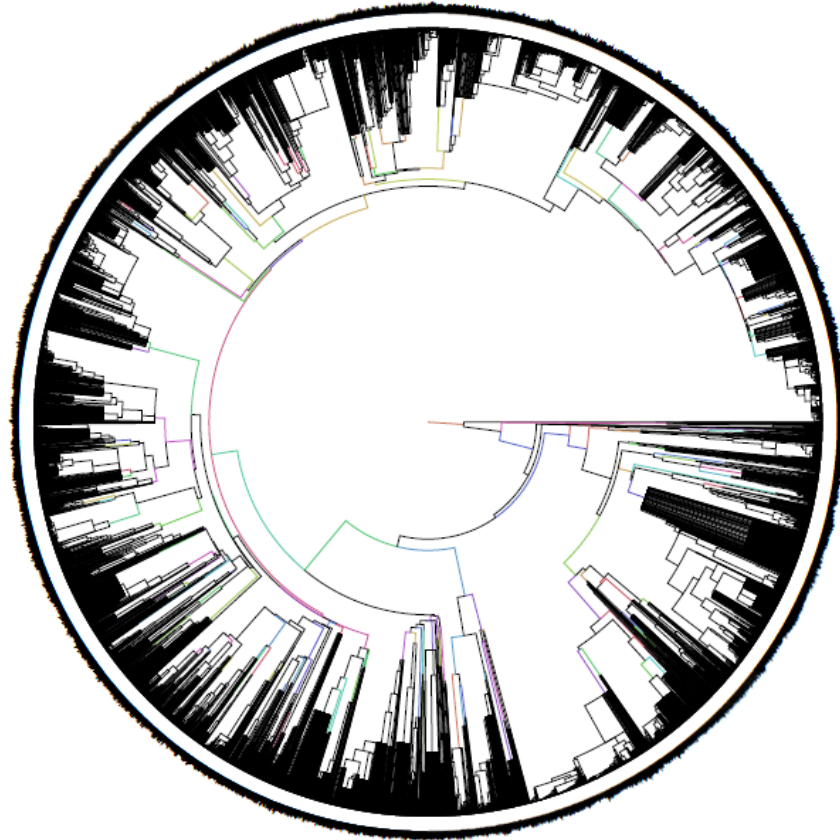

## Tables

**Table S1 Detailed results of phylogenetic structure (including all *p*-values corresponding to *NRI* and *NTI*) of the three representative floras across Yunnan according to the first approach which adds missing genera or species as polytomies within their families or genera.**

|                         | Flora of southern Yunnan |                  |                  | Flora of central Yunnan |                  |                  | Flora of northwestern Yunnan |                  |                  |
|-------------------------|--------------------------|------------------|------------------|-------------------------|------------------|------------------|------------------------------|------------------|------------------|
|                         | <i>TR</i>                | <i>NRI(p)</i>    | <i>NTI(p)</i>    | <i>TR</i>               | <i>NRI(p)</i>    | <i>NTI(p)</i>    | <i>TR</i>                    | <i>NRI(p)</i>    | <i>NTI(p)</i>    |
| At the family level     |                          |                  |                  |                         |                  |                  |                              |                  |                  |
| All families            | 193                      | -0.085<br>(0.53) | 1.139<br>(0.14)  | 174                     | -0.860<br>(0.80) | 1.459<br>(0.09)  | 170                          | 0.395<br>(0.32)  | 1.542<br>(0.06)  |
| Cosmopolitan            | 51                       | 1.302<br>(0.11)  | 2.587<br>(0.01)  | 50                      | 2.368<br>(0.01)  | 3.562<br>(0.01)  | 53                           | 1.822<br>(0.05)  | 3.665<br>(0.01)  |
| Tropical distributions  | 104                      | -0.321<br>(0.62) | 0.755<br>(0.22)  | 87                      | -1.295<br>(0.92) | 0.647<br>(0.28)  | 75                           | -0.420<br>(0.65) | 1.283<br>(0.12)  |
| PT                      | 72                       | -0.842<br>(0.78) | 0.785<br>(0.23)  | 63                      | -1.396<br>(0.94) | 0.684<br>(0.27)  | 54                           | -0.515<br>(0.68) | 1.552<br>(0.07)  |
| TATAD                   | 11                       | 2.288<br>(0.02)  | 1.803<br>(0.05)  | 11                      | 2.420<br>(0.01)  | 1.942<br>(0.04)  | 11                           | 2.198<br>(0.03)  | 0.766<br>(0.26)  |
| OWT                     | 4                        | -0.740<br>(0.77) | 0.310<br>(0.41)  | 3                       | -0.766<br>(0.83) | -0.820<br>(0.83) | 3                            | -0.766<br>(0.83) | -0.820<br>(0.83) |
| TATA                    | 5                        | -1.179<br>(0.92) | -0.203<br>(0.60) | 4                       | -0.841<br>(0.82) | -1.046<br>(0.87) | 4                            | -0.841<br>(0.82) | -1.046<br>(0.87) |
| TATAF                   | 3                        | -0.640<br>(0.61) | -0.304<br>(0.63) | 1                       | —                | —                | 0                            | —                | —                |
| TA                      | 9                        | 1.959<br>(0.06)  | 0.954<br>(0.17)  | 5                       | 1.298<br>(0.17)  | 1.107<br>(0.14)  | 3                            | 0.704<br>(0.37)  | 0.655<br>(0.25)  |
| Temperate distributions | 31                       | -1.097<br>(0.89) | -1.819<br>(0.97) | 34                      | -0.803<br>(0.80) | -1.771<br>(0.96) | 40                           | -0.430<br>(0.67) | -2.576<br>(0.99) |
| NT                      | 19                       | 0.697<br>(0.24)  | 0.909<br>(0.20)  | 23                      | 0.133<br>(0.43)  | 0.149<br>(0.47)  | 25                           | 0.328<br>(0.35)  | -0.041<br>(0.57) |
| EANAD                   | 10                       | -2.769<br>(1.00) | -2.107<br>(0.97) | 8                       | -1.835<br>(0.97) | -1.231<br>(0.89) | 9                            | -1.852<br>(0.99) | -1.750<br>(0.98) |
| OWTE                    | 0                        | —                | —                | 0                       | —                | —                | 1                            | —                | —                |
| EA                      | 2                        | 0.552<br>(0.41)  | 0.792<br>(0.29)  | 3                       | 0.449<br>(0.44)  | 0.352<br>(0.39)  | 5                            | 0.662<br>(0.27)  | 0.036<br>(0.44)  |
| EC                      | 1                        | —                | —                | 1                       | —                | —                | 1                            | —                | —                |
| ESHD                    | 1                        | —                | —                | 0                       | —                | —                | 0                            | —                | —                |
| At the genus level      |                          |                  |                  |                         |                  |                  |                              |                  |                  |



|                         |      |                  |                  |      |                  |                  |      |                  |                  |
|-------------------------|------|------------------|------------------|------|------------------|------------------|------|------------------|------------------|
| All genera              | 1238 | -3.178<br>(1.00) | -0.061<br>(0.52) | 1056 | 0.725<br>(0.23)  | 2.041<br>(0.02)  | 1250 | 3.225<br>(0.00)  | 2.472<br>(0.01)  |
| Cosmopolitan            | 65   | -2.241<br>(0.99) | 1.555<br>(0.07)  | 67   | -0.163<br>(0.55) | 2.163<br>(0.02)  | 83   | -0.823<br>(0.79) | 2.677<br>(0.01)  |
| Tropical distributions  | 949  | -3.017<br>(1.00) | 1.518<br>(0.07)  | 643  | 1.327<br>(0.10)  | 2.910<br>(0.00)  | 544  | -1.727<br>(0.96) | 2.976<br>(0.00)  |
| PT                      | 261  | -0.169<br>(0.55) | 1.801<br>(0.03)  | 205  | 0.868<br>(0.20)  | 1.845<br>(0.04)  | 190  | -0.255<br>(0.58) | 2.705<br>(0.00)  |
| TATAD                   | 31   | 0.250<br>(0.37)  | 0.837<br>(0.21)  | 36   | 2.442<br>(0.02)  | 0.706<br>(0.24)  | 30   | 2.384<br>(0.02)  | 1.151<br>(0.13)  |
| OWT                     | 130  | -0.261<br>(0.58) | 3.586<br>(0.00)  | 95   | 0.496<br>(0.30)  | 4.012<br>(0.00)  | 79   | -0.182<br>(0.55) | 3.761<br>(0.00)  |
| TATA                    | 135  | -2.766<br>(1.00) | 0.736<br>(0.22)  | 82   | -1.012<br>(0.85) | 1.148<br>(0.12)  | 62   | -2.014<br>(0.99) | -0.453<br>(0.67) |
| TATAF                   | 70   | 3.103<br>(0.01)  | 1.695<br>(0.04)  | 52   | 3.165<br>(0.00)  | 1.542<br>(0.06)  | 45   | 0.839<br>(0.19)  | 1.165<br>(0.13)  |
| TA                      | 322  | -1.738<br>(0.97) | -0.077<br>(0.54) | 173  | 0.055<br>(0.46)  | 1.301<br>(0.09)  | 138  | -0.639<br>(0.72) | 1.999<br>(0.02)  |
| Temperate distributions | 211  | 2.096<br>(0.03)  | -0.339<br>(0.64) | 331  | 3.284<br>(0.00)  | 1.488<br>(0.07)  | 573  | 3.141<br>(0.00)  | 1.065<br>(0.14)  |
| NT                      | 71   | 1.300<br>(0.10)  | -0.076<br>(0.52) | 130  | 1.205<br>(0.11)  | 0.630<br>(0.24)  | 207  | 0.059<br>(0.45)  | 0.547<br>(0.30)  |
| EANAD                   | 33   | 0.771<br>(0.21)  | -0.587<br>(0.72) | 38   | 0.662<br>(0.25)  | 0.193<br>(0.42)  | 65   | 0.455<br>(0.32)  | -0.197<br>(0.59) |
| OWTE                    | 27   | 1.932<br>(0.04)  | 1.505<br>(0.07)  | 45   | 2.713<br>(0.01)  | 3.801<br>(0.00)  | 90   | 3.985<br>(0.00)  | 3.657<br>(0.00)  |
| TEA                     | 6    | 0.846<br>(0.19)  | 1.840<br>(0.05)  | 6    | 0.824<br>(0.18)  | 1.632<br>(0.07)  | 16   | 1.412<br>(0.09)  | 2.806<br>(0.00)  |
| MWACA                   | 5    | 0.026<br>(0.41)  | -0.150<br>(0.50) | 7    | 0.463<br>(0.33)  | -0.574<br>(0.69) | 17   | 0.613<br>(0.26)  | 1.850<br>(0.04)  |
| CA                      | 2    | -1.049<br>(0.62) | -1.098<br>(0.63) | 2    | 1.018<br>(0.10)  | 0.938<br>(0.09)  | 12   | 1.672<br>(0.06)  | 0.675<br>(0.25)  |
| EA                      | 67   | 0.768<br>(0.21)  | 0.552<br>(0.28)  | 103  | 1.757<br>(0.05)  | -0.653<br>(0.74) | 166  | 1.809<br>(0.05)  | -0.280<br>(0.62) |
| EC                      | 13   | 2.284<br>(0.03)  | -0.037<br>(0.52) | 14   | 0.506<br>(0.27)  | -0.430<br>(0.64) | 46   | 2.350<br>(0.02)  | 0.533<br>(0.30)  |
| At the species level    |      |                  |                  |      |                  |                  |      |                  |                  |
| All species             | 3785 | -9.177<br>(1.00) | 2.136<br>(0.03)  | 2972 | 4.816<br>(0.01)  | 6.545<br>(0.01)  | 6107 | 6.625<br>(0.01)  | 5.809<br>(0.01)  |

*TR*, taxon richness; *NRI*, net relatedness index; *NTI*, nearest taxon index; PT,

pantropic; TATAD, tropical Asia and tropical America disjointed; OWT, old world

tropic; TATA, tropical Asia to tropical Australia; TATAF, tropical Asia to tropical

Africa; TA, tropical Asia; NT, north temperate; EANAD, east Asia and north America disjointed; OWTE, old world temperate; TEA, temperate Asia; MWACA, Mediterranean, west Asia to center Asia; CA, center Asia; EA, east Asia; EC, endemic to China; and ESHD, extratropical southern hemisphere disjointed or dispersed.

**Table S2 Detailed results of phylogenetic analyses on three representative floras across Yunnan according to the second approach which randomly adds missing genera or species within their families or genera.**

**(a) Phylogenetic structure of the three floras at the family, genus and species levels.**

|                         | Flora of southern Yunnan |                  |                  | Flora of central Yunnan |                  |                  | Flora of northwestern Yunnan |                  |                  |
|-------------------------|--------------------------|------------------|------------------|-------------------------|------------------|------------------|------------------------------|------------------|------------------|
|                         | <i>TR</i>                | <i>NRI (p)</i>   | <i>NTI (p)</i>   | <i>TR</i>               | <i>NRI (p)</i>   | <i>NTI (p)</i>   | <i>TR</i>                    | <i>NRI (p)</i>   | <i>NTI (p)</i>   |
| At the family level     |                          |                  |                  |                         |                  |                  |                              |                  |                  |
| All families            | 193                      | -0.136<br>(0.56) | 1.207<br>(0.14)  | 174                     | -0.794<br>(0.78) | 1.492<br>(0.07)  | 170                          | 0.524<br>(0.31)  | 1.483<br>(0.09)  |
| Cosmopolitan            | 51                       | 1.500<br>(0.06)  | 2.539<br>(0.02)  | 50                      | 2.645<br>(0.01)  | 3.595<br>(0.01)  | 53                           | 2.091<br>(0.02)  | 3.646<br>(0.01)  |
| Tropical distributions  | 104                      | -0.293<br>(0.62) | 0.763<br>(0.20)  | 87                      | -1.537<br>(0.95) | 0.592<br>(0.27)  | 75                           | -0.409<br>(0.64) | 1.112<br>(0.12)  |
| PT                      | 72                       | -0.939<br>(0.86) | 0.857<br>(0.16)  | 63                      | -1.616<br>(0.95) | 0.690<br>(0.27)  | 54                           | -0.474<br>(0.70) | 1.427<br>(0.06)  |
| TATAD                   | 11                       | 1.791<br>(0.06)  | 1.784<br>(0.04)  | 11                      | 2.067<br>(0.03)  | 2.113<br>(0.02)  | 11                           | 1.846<br>(0.06)  | 0.855<br>(0.20)  |
| OWT                     | 4                        | -0.788<br>(0.77) | 0.295<br>(0.36)  | 3                       | -0.791<br>(0.83) | -0.941<br>(0.85) | 3                            | -0.791<br>(0.83) | -0.941<br>(0.85) |
| TATA                    | 5                        | -0.884<br>(0.84) | -0.383<br>(0.61) | 4                       | -0.636<br>(0.75) | -1.292<br>(0.91) | 4                            | -0.636<br>(0.75) | -1.292<br>(0.91) |
| TATAF                   | 3                        | -0.670<br>(0.63) | -0.420<br>(0.61) | 1                       | —                | —                | 0                            | —                | —                |
| TA                      | 9                        | 2.133<br>(0.02)  | 1.168<br>(0.14)  | 5                       | 1.331<br>(0.14)  | 1.152<br>(0.10)  | 3                            | 0.773<br>(0.32)  | 0.746<br>(0.20)  |
| Temperate distributions | 31                       | -1.248<br>(0.88) | -1.792<br>(0.97) | 34                      | -0.936<br>(0.84) | -1.858<br>(0.96) | 40                           | -0.561<br>(0.70) | -2.657<br>(1.00) |
| NT                      | 19                       | 0.547<br>(0.33)  | 0.791<br>(0.22)  | 23                      | 0.027<br>(0.48)  | 0.038<br>(0.52)  | 25                           | 0.229<br>(0.40)  | -0.154<br>(0.59) |
| EANAD                   | 10                       | -2.624<br>(1.00) | -2.182<br>(1.00) | 8                       | -1.796<br>(0.96) | -1.263<br>(0.91) | 9                            | -1.792<br>(0.96) | -1.719<br>(0.97) |
| OWTE                    | 0                        | —                | —                | 0                       | —                | —                | 1                            | —                | —                |
| EA                      | 2                        | 0.738<br>(0.35)  | 0.698<br>(0.34)  | 3                       | 0.606<br>(0.36)  | 0.370<br>(0.43)  | 5                            | 0.795<br>(0.22)  | 0.051<br>(0.45)  |
| EC                      | 1                        | —                | —                | 1                       | —                | —                | 1                            | —                | —                |
| ESHD                    | 1                        | —                | —                | 0                       | —                | —                | 0                            | —                | —                |
| At the genus level      |                          |                  |                  |                         |                  |                  |                              |                  |                  |

|                         |      |                  |                  |      |                  |                  |      |                  |                  |
|-------------------------|------|------------------|------------------|------|------------------|------------------|------|------------------|------------------|
| All genera              | 1238 | -3.185<br>(1.00) | -0.016<br>(0.51) | 1056 | 3.036<br>(0.00)  | 1.586<br>(0.05)  | 1250 | 0.803<br>(0.21)  | 2.449<br>(0.01)  |
| Cosmopolitan            | 65   | -2.220<br>(0.99) | 1.898<br>(0.02)  | 67   | -0.202<br>(0.56) | 2.633<br>(0.01)  | 83   | -0.851<br>(0.81) | 3.184<br>(0.00)  |
| Tropical distributions  | 949  | -3.000<br>(1.00) | 2.873<br>(0.00)  | 643  | 1.251<br>(0.11)  | 2.777<br>(0.00)  | 544  | -1.654<br>(0.95) | 2.983<br>(0.00)  |
| PT                      | 261  | -0.234<br>(0.57) | 1.747<br>(0.03)  | 205  | 0.860<br>(0.20)  | 2.001<br>(0.02)  | 190  | -0.343<br>(0.61) | 2.591<br>(0.00)  |
| TATAD                   | 31   | 0.243<br>(0.38)  | 0.062<br>(0.50)  | 36   | 2.539<br>(0.01)  | 0.191<br>(0.44)  | 30   | 2.422<br>(0.02)  | 0.517<br>(0.31)  |
| OWT                     | 130  | -0.338<br>(0.60) | 3.354<br>(0.00)  | 95   | 0.473<br>(0.31)  | 3.766<br>(0.00)  | 79   | -0.228<br>(0.56) | 3.502<br>(0.00)  |
| TATA                    | 135  | -2.433<br>(1.00) | 1.975<br>(0.03)  | 82   | -0.755<br>(0.76) | 1.517<br>(0.06)  | 62   | -1.603<br>(0.95) | 0.09<br>(0.46)   |
| TATAF                   | 70   | 3.034<br>(0.00)  | 1.421<br>(0.07)  | 52   | 3.201<br>(0.01)  | 1.215<br>(0.11)  | 45   | 0.881<br>(0.19)  | 0.642<br>(0.26)  |
| TA                      | 322  | -1.561<br>(0.94) | 2.060<br>(0.02)  | 173  | 0.056<br>(0.46)  | 2.073<br>(0.02)  | 138  | -0.573<br>(0.71) | 2.270<br>(0.02)  |
| Temperate distributions | 211  | 2.116<br>(0.02)  | -0.299<br>(0.62) | 331  | 3.239<br>(0.00)  | 2.066<br>(0.02)  | 573  | 3.326<br>(0.00)  | 2.706<br>(0.01)  |
| NT                      | 71   | 1.361<br>(0.10)  | 0.282<br>(0.39)  | 130  | 1.185<br>(0.13)  | 1.020<br>(0.16)  | 207  | 0.190<br>(0.41)  | 2.093<br>(0.02)  |
| EANAD                   | 33   | 0.753<br>(0.21)  | -0.997<br>(0.85) | 38   | 0.671<br>(0.25)  | -0.013<br>(0.51) | 65   | 0.363<br>(0.34)  | -0.228<br>(0.60) |
| OWTE                    | 27   | 1.949<br>(0.04)  | 1.227<br>(0.11)  | 45   | 2.801<br>(0.01)  | 3.776<br>(0.00)  | 90   | 4.094<br>(0.00)  | 4.023<br>(0.00)  |
| TEA                     | 6    | 0.884<br>(0.18)  | 1.636<br>(0.06)  | 6    | 0.807<br>(0.17)  | 1.550<br>(0.08)  | 16   | 1.395<br>(0.10)  | 2.536<br>(0.01)  |
| MWACA                   | 5    | 0.064<br>(0.36)  | -0.253<br>(0.56) | 7    | 0.457<br>(0.28)  | -0.617<br>(0.70) | 17   | 0.693<br>(0.24)  | 1.858<br>(0.04)  |
| CA                      | 2    | -1.042<br>(0.62) | -1.121<br>(0.65) | 2    | 0.825<br>(0.12)  | 1.001<br>(0.10)  | 12   | 1.625<br>(0.07)  | 0.690<br>(0.25)  |
| EA                      | 67   | 0.842<br>(0.21)  | 1.290<br>(0.10)  | 103  | 1.953<br>(0.03)  | 0.348<br>(0.38)  | 166  | 1.901<br>(0.03)  | 0.951<br>(0.17)  |
| EC                      | 13   | 2.220<br>(0.03)  | 0.402<br>(0.32)  | 14   | 0.466<br>(0.30)  | -0.645<br>(0.74) | 46   | 2.386<br>(0.01)  | 0.977<br>(0.17)  |
| At the species level    |      |                  |                  |      |                  |                  |      |                  |                  |
| All species             | 3785 | -8.882<br>(1.00) | -4.238<br>(1.00) | 2972 | 4.590<br>(0.01)  | 0.680<br>(0.28)  | 6107 | 6.496<br>(0.01)  | 8.580<br>(0.01)  |

*TR*, taxon richness; *NRI*, net relatedness index; *NTI*, nearest taxon index; PT,

pantropic; TATAD, tropical Asia and tropical America disjointed; OWT, old world

tropic; TATA, tropical Asia to tropical Australia; TATAF, tropical Asia to tropical

Africa; TA, tropical Asia; NT, north temperate; EANAD, east Asia and north America disjointed; OWTE, old world temperate; TEA, temperate Asia; MWACA, Mediterranean, west Asia to center Asia; CA, center Asia EA, east Asia; EC, endemic to China; and ESHD, extratropical southern hemisphere disjointed or dispersed.

**(b) Phylogenetic similarity (*PhyloSor*) among the three floras at the family,  
genus and species levels.**

|               | At the family level |       |       | At the genus level |       |       | At the species level |       |       |
|---------------|---------------------|-------|-------|--------------------|-------|-------|----------------------|-------|-------|
|               | BN-ZB               | ZB-DQ | DQ-BN | BN-ZB              | ZB-DQ | DQ-BN | BN-ZB                | ZB-DQ | DQ-BN |
| All taxa      | 0.904               | 0.906 | 0.837 | 0.785              | 0.782 | 0.676 | 0.649                | 0.626 | 0.490 |
| Cosmopolitan  | 0.944               | 0.976 | 0.955 | 0.909              | 0.886 | 0.852 | —                    | —     | —     |
| tropical      |                     |       |       |                    |       |       |                      |       |       |
| distributions | 0.918               | 0.888 | 0.828 | 0.788              | 0.820 | 0.710 | —                    | —     | —     |
| PT            | 0.948               | 0.876 | 0.852 | 0.828              | 0.878 | 0.794 | —                    | —     | —     |
| TATAD         | 0.925               | 0.939 | 0.867 | 0.795              | 0.874 | 0.766 | —                    | —     | —     |
| OWT           | 0.913               | 1.000 | 0.913 | 0.840              | 0.806 | 0.768 | —                    | —     | —     |
| TATA          | 0.923               | 1.000 | 0.923 | 0.786              | 0.809 | 0.702 | —                    | —     | —     |
| TATAF         | 0.614               | —     | —     | 0.770              | 0.852 | 0.713 | —                    | —     | —     |
| TA            | 0.766               | 0.827 | 0.609 | 0.715              | 0.726 | 0.601 | —                    | —     | —     |
| Temperate     |                     |       |       |                    |       |       |                      |       |       |
| distributions | 0.880               | 0.903 | 0.813 | 0.781              | 0.766 | 0.639 | —                    | —     | —     |
| NT            | 0.899               | 0.962 | 0.862 | 0.752              | 0.842 | 0.653 | —                    | —     | —     |
| EANAD         | 0.880               | 0.885 | 0.851 | 0.810              | 0.683 | 0.627 | —                    | —     | —     |
| OWTE          | —                   | —     | —     | 0.729              | 0.684 | 0.573 | —                    | —     | —     |
| TEA           | —                   | —     | —     | 0.813              | 0.507 | 0.410 | —                    | —     | —     |
| MWACA         | —                   | —     | —     | 0.870              | 0.780 | 0.660 | —                    | —     | —     |
| CA            | —                   | —     | —     | 0.380              | 0.365 | 0.401 | —                    | —     | —     |
| EA            | 0.841               | 0.801 | 0.653 | 0.732              | 0.803 | 0.605 | —                    | —     | —     |
| EC            | 1.000               | 0.437 | 0.437 | 0.553              | 0.445 | 0.285 | —                    | —     | —     |
| ESHD          | —                   | —     | —     | —                  | —     | —     | —                    | —     | —     |

BN, southern Yunnan; ZB, central Yunnan; and DQ, northwestern Yunnan.

**(c) The standardized effect sizes of phylogenetic beta diversity (*S.E.S. D<sub>nn</sub>*)**

**among the three floras at the family, genus and species levels.**

| Groups        | At the family level |        |        | At the genus level |        |        | At the species level |        |        |
|---------------|---------------------|--------|--------|--------------------|--------|--------|----------------------|--------|--------|
|               | BN-ZB               | ZB-DQ  | DQ-BN  | BN-ZB              | ZB-DQ  | DQ-BN  | BN-ZB                | ZB-DQ  | DQ-BN  |
| All taxa      | 138.45              | 107.22 | 161.16 | 242.34             | 241.11 | 354.40 | 329.58               | 444.56 | 638.83 |
| Cosmopolitan  | 25.41               | 26.58  | 25.95  | 29.92              | 32.20  | 31.89  | —                    | —      | —      |
| tropical      |                     |        |        |                    |        |        |                      |        |        |
| distributions | 41.18               | 34.96  | 36.98  | 147.97             | 119.83 | 132.17 | —                    | —      | —      |
| PT            | 31.66               | 26.67  | 27.71  | 59.60              | 55.04  | 56.11  | —                    | —      | —      |
| TATAD         | 9.81                | 10.21  | 9.92   | 18.48              | 19.89  | 17.79  | —                    | —      | —      |
| OWT           | 4.76                | 4.75   | 4.76   | 38.74              | 36.37  | 37.36  | —                    | —      | —      |
| TATA          | 5.93                | 5.97   | 5.93   | 37.53              | 32.12  | 33.45  | —                    | —      | —      |
| TATAF         | 0.23                | —      | —      | 27.65              | 24.48  | 25.86  | —                    | —      | —      |
| TA            | 6.81                | 5.01   | 4.63   | 58.45              | 47.83  | 54.24  | —                    | —      | —      |
| Temperate     |                     |        |        |                    |        |        |                      |        |        |
| distributions | 19.04               | 21.00  | 19.13  | 68.68              | 92.71  | 79.32  | —                    | —      | —      |
| NT            | 13.99               | 15.97  | 14.22  | 36.60              | 50.77  | 39.55  | —                    | —      | —      |
| EANAD         | 9.34                | 9.16   | 9.50   | 19.78              | 21.37  | 19.59  | —                    | —      | —      |
| OWTE          | —                   | —      | —      | 19.30              | 25.95  | 19.38  | —                    | —      | —      |
| TEA           | —                   | —      | —      | 7.47               | 7.71   | 6.15   | —                    | —      | —      |
| MWACA         | —                   | —      | —      | 6.56               | 10.04  | 6.62   | —                    | —      | —      |
| CA            | —                   | —      | —      | 0.77               | 3.52   | 2.85   | —                    | —      | —      |
| EA            | 3.58                | 4.67   | 3.24   | 30.53              | 40.55  | 31.67  | —                    | —      | —      |
| EC            | —                   | 0.21   | 0.21   | 8.71               | 12.38  | 8.95   | —                    | —      | —      |
| ESHD          | —                   | —      | —      | —                  | —      | —      | —                    | —      | —      |

BN, southern Yunnan; ZB, central Yunnan; and DQ, northwestern Yunnan.



**Table S3 Detailed results of phylogenetic analyses on three representative floras across Yunnan according to the third approach which adds missing genera or species to their families or genera with the same approach used in Phylomatic and BLADJ.**

**(a) Phylogenetic structure of the three floras at the family, genus and species levels.**

|                         | Flora of southern Yunnan |                  |                  | Flora of central Yunnan |                  |                  | Flora of northwestern Yunnan |                  |                  |
|-------------------------|--------------------------|------------------|------------------|-------------------------|------------------|------------------|------------------------------|------------------|------------------|
|                         | <i>TR</i>                | <i>NRI (p)</i>   | <i>NTI (p)</i>   | <i>TR</i>               | <i>NRI (p)</i>   | <i>NTI (p)</i>   | <i>TR</i>                    | <i>NRI (p)</i>   | <i>NTI (p)</i>   |
| At the family level     |                          |                  |                  |                         |                  |                  |                              |                  |                  |
| All families            | 193                      | -0.086<br>(0.51) | 1.225<br>(0.12)  | 174                     | -0.797<br>(0.79) | 1.524<br>(0.06)  | 170                          | 0.414<br>(0.32)  | 1.585<br>(0.06)  |
| Cosmopolitan            | 51                       | 1.381<br>(0.10)  | 2.711<br>(0.01)  | 50                      | 2.320<br>(0.02)  | 3.693<br>(0.01)  | 53                           | 1.805<br>(0.04)  | 3.884<br>(0.01)  |
| Tropical distributions  | 104                      | -0.345<br>(0.63) | 0.753<br>(0.21)  | 87                      | -1.445<br>(0.93) | 0.691<br>(0.26)  | 75                           | -0.401<br>(0.66) | 1.219<br>(0.11)  |
| PT                      | 72                       | -0.948<br>(0.82) | 0.828<br>(0.21)  | 63                      | -1.513<br>(0.95) | 0.777<br>(0.21)  | 54                           | -0.515<br>(0.73) | 1.578<br>(0.06)  |
| TATAD                   | 11                       | 2.275<br>(0.01)  | 1.675<br>(0.05)  | 11                      | 2.350<br>(0.03)  | 1.975<br>(0.03)  | 11                           | 2.105<br>(0.03)  | 0.843<br>(0.22)  |
| OWT                     | 4                        | -0.635<br>(0.73) | 0.190<br>(0.41)  | 3                       | -0.727<br>(0.78) | -0.957<br>(0.81) | 3                            | -0.727<br>(0.78) | -0.957<br>(0.81) |
| TATA                    | 5                        | -0.968<br>(0.88) | -0.217<br>(0.59) | 4                       | -0.707<br>(0.78) | -1.258<br>(0.89) | 4                            | -0.707<br>(0.78) | -1.258<br>(0.89) |
| TATAF                   | 3                        | -0.694<br>(0.58) | -0.366<br>(0.59) | 1                       | —                | —                | 0                            | —                | —                |
| TA                      | 9                        | 1.997<br>(0.05)  | 1.160<br>(0.14)  | 5                       | 1.261<br>(0.18)  | 1.008<br>(0.14)  | 3                            | 0.693<br>(0.36)  | 0.562<br>(0.27)  |
| Temperate distributions | 31                       | -1.108<br>(0.89) | -1.795<br>(0.98) | 34                      | -0.760<br>(0.80) | -1.714<br>(0.96) | 40                           | -0.454<br>(0.67) | -2.495<br>(0.99) |
| NT                      | 19                       | 0.633<br>(0.22)  | 0.870<br>(0.19)  | 23                      | 0.141<br>(0.44)  | 0.147<br>(0.45)  | 25                           | 0.343<br>(0.34)  | -0.066<br>(0.52) |
| EANAD                   | 10                       | -2.608<br>(1.00) | -2.179<br>(0.99) | 8                       | -1.676<br>(0.95) | -1.193<br>(0.90) | 9                            | -1.761<br>(0.97) | -1.685<br>(0.97) |
| OWTE                    | 0                        | —                | —                | 0                       | —                | —                | 1                            | —                | —                |
| EA                      | 2                        | 0.781<br>(0.32)  | 0.733<br>(0.35)  | 3                       | 0.554<br>(0.40)  | 0.391<br>(0.40)  | 5                            | 0.789<br>(0.24)  | 0.181<br>(0.38)  |
| EC                      | 1                        | —                | —                | 1                       | —                | —                | 1                            | —                | —                |

| ESHD                    | 1    | —                 | —                | 0    | —                | —                | 0    | —                | —                |
|-------------------------|------|-------------------|------------------|------|------------------|------------------|------|------------------|------------------|
| At the genus level      |      |                   |                  |      |                  |                  |      |                  |                  |
| All genera              | 1238 | -3.282<br>(1.00)  | 1.679<br>(0.05)  | 1056 | 3.273<br>(0.00)  | 5.334<br>(0.00)  | 1250 | 0.913<br>(0.19)  | 4.597<br>(0.00)  |
| Cosmopolitan            | 65   | -2.195<br>(0.99)  | 3.248<br>(0.00)  | 67   | -0.120<br>(0.52) | 4.030<br>(0.00)  | 83   | -0.764<br>(0.77) | 4.872<br>(0.00)  |
| Tropical distributions  | 949  | -3.015<br>(1.00)  | 1.575<br>(0.05)  | 643  | 1.334<br>(0.10)  | 3.751<br>(0.00)  | 544  | -1.722<br>(0.96) | 3.694<br>(0.00)  |
| PT                      | 261  | -0.178<br>(0.57)  | 3.750<br>(0.00)  | 205  | 0.851<br>(0.21)  | 3.474<br>(0.00)  | 190  | -0.335<br>(0.63) | 4.057<br>(0.00)  |
| TATAD                   | 31   | 0.170<br>(0.39)   | -0.769<br>(0.78) | 36   | 2.368<br>(0.02)  | 0.251<br>(0.40)  | 30   | 2.288<br>(0.02)  | 0.557<br>(0.28)  |
| OWT                     | 130  | -0.250<br>(0.60)  | 3.916<br>(0.00)  | 95   | 0.573<br>(0.28)  | 4.363<br>(0.00)  | 79   | -0.152<br>(0.53) | 3.833<br>(0.00)  |
| TATA                    | 135  | -2.758<br>(1.00)  | 1.346<br>(0.10)  | 82   | -0.902<br>(0.82) | 1.284<br>(0.10)  | 62   | -1.907<br>(0.98) | -0.268<br>(0.60) |
| TATAF                   | 70   | 3.175<br>(0.00)   | 1.959<br>(0.03)  | 52   | 3.060<br>(0.01)  | 1.828<br>(0.03)  | 45   | 0.912<br>(0.19)  | 1.275<br>(0.11)  |
| TA                      | 322  | -1.698<br>(0.96)  | -1.585<br>(0.95) | 173  | 0.070<br>(0.45)  | 0.512<br>(0.31)  | 138  | -0.733<br>(0.75) | 1.263<br>(0.10)  |
| Temperate distributions | 71   | 1.991<br>(0.03)   | 1.484<br>(0.06)  | 130  | 3.282<br>(0.00)  | 4.430<br>(0.00)  | 207  | 3.215<br>(0.00)  | 3.817<br>(0.00)  |
| NT                      | 211  | 1.354<br>(0.09)   | 1.753<br>(0.04)  | 331  | 1.285<br>(0.10)  | 2.856<br>(0.00)  | 573  | 0.279<br>(0.40)  | 4.227<br>(0.00)  |
| EANAD                   | 33   | 0.818<br>(0.21)   | -0.520<br>(0.70) | 38   | 0.709<br>(0.24)  | 0.524<br>(0.30)  | 65   | 0.403<br>(0.32)  | 0.914<br>(0.18)  |
| OWTE                    | 27   | 1.996<br>(0.04)   | 1.910<br>(0.03)  | 45   | 2.859<br>(0.00)  | 4.656<br>(0.00)  | 90   | 4.064<br>(0.00)  | 5.253<br>(0.00)  |
| TEA                     | 6    | 0.822<br>(0.19)   | 1.880<br>(0.05)  | 6    | 0.735<br>(0.20)  | 1.718<br>(0.06)  | 16   | 1.370<br>(0.10)  | 2.387<br>(0.01)  |
| MWACA                   | 5    | 0.053<br>(0.38)   | -0.121<br>(0.50) | 7    | 0.513<br>(0.28)  | -0.497<br>(0.65) | 17   | 0.524<br>(0.27)  | 2.111<br>(0.02)  |
| CA                      | 2    | -1.207<br>(0.67)  | -1.035<br>(0.60) | 2    | 0.948<br>(0.11)  | 0.879<br>(0.11)  | 12   | 1.354<br>(0.11)  | -0.008<br>(0.49) |
| EA                      | 67   | 0.758<br>(0.22)   | 1.562<br>(0.06)  | 103  | 1.827<br>(0.04)  | 0.056<br>(0.48)  | 166  | 1.705<br>(0.06)  | -0.803<br>(0.80) |
| EC                      | 13   | 2.229<br>(0.03)   | 0.012<br>(0.48)  | 14   | 0.493<br>(0.30)  | -0.417<br>(0.66) | 46   | 2.230<br>(0.02)  | -0.502<br>(0.71) |
| At the species level    |      |                   |                  |      |                  |                  |      |                  |                  |
| All species             | 3785 | -10.377<br>(1.00) | 2.370<br>(0.01)  | 2972 | 4.887<br>(0.01)  | 6.784<br>(0.01)  | 6107 | 7.230<br>(0.01)  | 6.119<br>(0.01)  |

*TR*, taxon richness; *NRI*, net relatedness index; *NTI*, nearest taxon index; PT,

pantropic; TATAD, tropical Asia and tropical America disjointed; OWT, old world

tropic; TATA, tropical Asia to tropical Australia; TATAF, tropical Asia to tropical Africa; TA, tropical Asia; NT, north temperate; EANAD, east Asia and north America disjointed; OWTE, old world temperate; TEA, temperate Asia; MWACA, Mediterranean, west Asia to center Asia; CA, center Asia; EA, east Asia; EC, endemic to China; and ESHD, extratropical southern hemisphere disjointed or dispersed.

**(b) Phylogenetic similarity (*PhyloSor*) among the three floras at the family,  
genus and species levels.**

|               | At the family level |       |       | At the genus level |       |       | At the species level |       |       |
|---------------|---------------------|-------|-------|--------------------|-------|-------|----------------------|-------|-------|
|               | BN-ZB               | ZB-DQ | DQ-BN | BN-ZB              | ZB-DQ | DQ-BN | BN-ZB                | ZB-DQ | DQ-BN |
| All taxa      | 0.904               | 0.906 | 0.837 | 0.734              | 0.727 | 0.595 | 0.528                | 0.449 | 0.322 |
| Cosmopolitan  | 0.944               | 0.976 | 0.955 | 0.907              | 0.885 | 0.851 | —                    | —     |       |
| tropical      |                     |       |       |                    |       |       |                      |       |       |
| distributions | 0.918               | 0.888 | 0.828 | 0.733              | 0.785 | 0.641 | —                    | —     | —     |
| PT            | 0.948               | 0.876 | 0.852 | 0.818              | 0.856 | 0.763 | —                    | —     | —     |
| TATAD         | 0.925               | 0.939 | 0.867 | 0.780              | 0.872 | 0.754 | —                    | —     |       |
| OWT           | 0.913               | 1.000 | 0.913 | 0.822              | 0.786 | 0.754 | —                    | —     | —     |
| TATA          | 0.923               | 1.000 | 0.923 | 0.769              | 0.789 | 0.683 | —                    | —     | —     |
| TATAF         | 0.614               | 0.000 | 0.000 | 0.759              | 0.841 | 0.696 | —                    | —     |       |
| TA            | 0.766               | 0.827 | 0.609 | 0.645              | 0.700 | 0.509 | —                    | —     | —     |
| Temperate     |                     |       |       |                    |       |       |                      |       |       |
| distributions | 0.880               | 0.903 | 0.813 | 0.749              | 0.710 | 0.574 | —                    | —     | —     |
| NT            | 0.899               | 0.962 | 0.861 | 0.736              | 0.822 | 0.624 | —                    | —     |       |
| EANAD         | 0.880               | 0.885 | 0.851 | 0.808              | 0.679 | 0.622 | —                    | —     |       |
| OWTE          | —                   | —     | —     | 0.714              | 0.652 | 0.549 | —                    | —     | —     |
| TEA           | —                   | —     | —     | 0.813              | 0.490 | 0.396 | —                    | —     | —     |
| MWACA         | —                   | —     | —     | 0.870              | 0.761 | 0.642 | —                    | —     |       |
| CA            | —                   | —     | —     | 0.380              | 0.342 | 0.377 | —                    | —     |       |
| EA            | 0.841               | 0.801 | 0.653 | 0.703              | 0.745 | 0.543 | —                    | —     | —     |
| EC            | 1.000               | 0.437 | 0.437 | 0.543              | 0.403 | 0.258 | —                    | —     | —     |
| ESHD          | —                   | —     | —     | —                  | —     | —     | —                    | —     |       |

BN, southern Yunnan; ZB, central Yunnan; and DQ, northwestern Yunnan.

**(c) The standardized effect sizes of phylogenetic beta diversity (*S.E.S. D<sub>nn</sub>*)**

**among the three floras at the family, genus and species levels.**

| Groups        | At the family level |        |        | At the genus level |        |        | At the species level |        |        |
|---------------|---------------------|--------|--------|--------------------|--------|--------|----------------------|--------|--------|
|               | BN-ZB               | ZB-DQ  | DQ-BN  | BN-ZB              | ZB-DQ  | DQ-BN  | BN-ZB                | ZB-DQ  | DQ-BN  |
| All taxa      | 141.03              | 102.85 | 162.82 | 236.10             | 224.68 | 350.09 | 304.50               | 410.84 | 589.18 |
| Cosmopolitan  | 26.87               | 27.85  | 27.50  | 29.55              | 30.03  | 31.01  | —                    | —      | —      |
| tropical      |                     |        |        |                    |        |        |                      |        |        |
| distributions | 38.13               | 33.61  | 34.90  | 129.85             | 111.33 | 127.08 | —                    | —      | —      |
| PT            | 30.82               | 26.80  | 28.08  | 59.69              | 52.28  | 57.27  | —                    | —      | —      |
| TATAD         | 10.62               | 10.91  | 10.29  | 18.94              | 19.22  | 17.62  | —                    | —      | —      |
| OWT           | 4.98                | 4.92   | 4.98   | 36.89              | 31.73  | 33.05  | —                    | —      | —      |
| TATA          | 6.09                | 6.13   | 6.09   | 34.80              | 29.25  | 31.46  | —                    | —      | —      |
| TATAF         | 0.12                | —      | —      | 26.79              | 23.66  | 25.76  | —                    | —      | —      |
| TA            | 6.71                | 5.20   | 4.62   | 53.63              | 46.82  | 48.42  | —                    | —      | —      |
| Temperate     |                     |        |        |                    |        |        |                      |        |        |
| distributions | 16.45               | 18.51  | 16.89  | 59.22              | 82.53  | 64.52  | —                    | —      | —      |
| NT            | 13.43               | 15.02  | 13.58  | 29.93              | 47.19  | 32.40  | —                    | —      | —      |
| EANAD         | 7.79                | 7.56   | 7.72   | 17.73              | 19.27  | 17.43  | —                    | —      | —      |
| OWTE          | —                   | —      | —      | 19.75              | 27.72  | 19.35  | —                    | —      | —      |
| TEA           | —                   | —      | —      | 7.69               | 7.89   | 5.90   | —                    | —      | —      |
| MWACA         | —                   | —      | —      | 6.86               | 9.80   | 6.91   | —                    | —      | —      |
| CA            | —                   | —      | —      | 0.88               | 3.39   | 2.98   | —                    | —      | —      |
| EA            | 3.48                | 4.68   | 3.20   | 29.78              | 40.29  | 30.71  | —                    | —      | —      |
| EC            | —                   | 0.16   | 0.16   | 8.98               | 11.05  | 8.23   | —                    | —      | —      |
| ESHD          | —                   | —      | —      | —                  | —      | —      | —                    | —      | —      |

BN, southern Yunnan; ZB, central Yunnan; and DQ, northwestern Yunnan.
